# Supplementary material
Source: PubMed Central journal article supplement (PMC7616955)

1 **Supplemental methods and results**

2

3 **Human lung conventional dendritic cells orchestrate lymphoid neogenesis during COPD**

4

5 **Authors:** Thomas Naessens, Yannick Morias\*, Eva Hamrud\*, Ulf Gehrman,  
6 Ramachandramouli Budida, Johan Mattsson, Tina Baker, Gabriel Skogberg, Elisabeth  
7 Israelsson, Kristofer Thörn, Martijn J. Schuijs, Bastian Angermann, Faye Melville, Karl J  
8 Staples, Danen M Cunoosamy# and Bart N Lambrecht#

9

10 \*Authors contributed equally to this paper

11 #Authors co-supervised the study

## 12 **Supplemental Methods**

13

### 14 **Human lung samples**

15 Lung samples were obtained from 35 non-obstructed control subjects (i.e. normal  
16 lung function, among whom 8 never-smokers, 1 current smoker and 26 former smokers) and  
17 12 patients with COPD undergoing lung surgery, either for resection of a solitary tumor (24  
18 control subjects and 7 COPD GOLD II subjects) or transplantation for very severe COPD (5  
19 COPD GOLD IV subjects) at the Sahlgrenska University Hospital, Gothenburg, Sweden. All  
20 subjects underwent preoperative post-bronchodilator spirometry. Subjects were categorized by  
21 based on the 2001 classification of the Global Initiative for Chronic Obstructive Lung Disease  
22 (GOLD) (1). In case of resected tissue, macroscopically healthy lung was sampled. We defined  
23 ex-smokers as having quit smoking habits for at least 6 months before surgery.

24

### 25 **Human lung sample processing**

26 Lung tissue was extensively flushed with PBS (Invitrogen) to remove excessive  
27 blood contamination and alveolar cells. The flushed tissue was subsequently cut into small  
28 pieces (0,5 cm x 0,5 cm) and incubated in a digestion buffer, containing 1mg/ml Collagenase  
29 D (Sigma-Aldrich) in RPMI medium (Invitrogen), for 30 minutes at 37°C. Afterwards, the lung  
30 tissue pieces were minced over a 100 µm cell strainer (Miltenyi Biotec) to obtain a single cell  
31 suspension.

32

### 33 **Single-cell RNA sequencing of human lung myeloid cells**

34 FACS-sorted myeloid subpopulations were stained with Hoechst 33342 and  
35 Propidium Iodide dye mix (Invitrogen, MA, USA) and diluted to 20,000 cells/mL. The cells  
36 were dispensed into nanowells using the ICELL8 Single-Cell System (Takara Bio, Japan), and

37 single live cells were identified using CellSelect software (WaferGen, CA, USA). After a  
38 freeze-thaw cycle, the cells were processed for RT-PCR and cDNA amplification according to  
39 the manufacturer's instructions. The cDNA amplicons were then pooled and concentrated using  
40 Zymo DNA Clean & Concentrator<sup>TM</sup>-5 kit (Zymo Research, CA, USA) followed by cDNA  
41 purification using 0.6X AMPure XP beads (Beckman Coulter, IN, USA) and quantification  
42 using Qubit dsDNA HS Assay Kit on the Qubit fluorometer (Thermo Fisher, MA, USA). The  
43 cDNA was quality checked using HS NGS kit on a Fragment Analyzer (Agilent, CA, USA).  
44 The purified cDNA was subsequently used for Nextera XT (Illumina, CA, USA) library  
45 preparation and amplification. A total of three lung tissues were processed individually for the  
46 library preparation. The quality and quantity of the libraries was analyzed using HS NGS  
47 Fragment Analyzer and Qubit dsDNA HS Assay Kit respectively. Sample libraries were pooled  
48 in equimolar concentrations and diluted and denatured according to Illumina guidelines.  
49 Sequencing was performed using a High Output 150 cycle kit on an Illumina NextSeq550 using  
50 26 cycles for read1, and 126 cycles for read2.

51 ***Raw sequence processing and quality control.*** RNA-seq fastq files were  
52 processed using bcbio-nextgen (version 1.1.0) (bcbio-nextgen. Validated, scalable, community  
53 developed variant calling, RNA-seq and small RNA analysis. Available from:  
54 <https://github.com/chapmanb/bcbio-nextgen>) where reads were mapped to the human genome  
55 build hg38 (GRCh38.92 version 25) using hisat2 (version 2.1.0) (2). For the bulk dataset this  
56 yielded between 37.2 – 64.9 M mapped reads per sample (with a mean of 49.4 M). No filtering  
57 of samples or genes was performed on the bulk RNA sequencing data. For the single cell  
58 dataset, 180 M reads aligned to genes. Gene level quantifications, counts and transcript per  
59 million (TPM), were generated with featurecounts (version 1.4.4) (3) and sailfish (version  
60 0.10.1) (4), respectively, all within bcbio. The single cell dataset was additionally  
61 demultiplexed using UMIs with the umis (version 1.0.0), also within the bcbio framework.

62 Quality control included filtering by, the number of genes per cell, mitochondrial gene  
63 contribution and minimum gene representation across cells.

64 ***Single cell sequencing data clustering and cluster identification.*** For the single  
65 cell data, most analyses were performed using Seurat toolkit (4) (<https://satijalab.org/seurat/>,  
66 version 3.1.0) available in R (R version 3.5.1). Single cell data was processed to regress out  
67 unwanted sources of variation. Cells from the three donors were aggregated into separate Seurat  
68 objects, these were then aligned to each other using canonical correlation analysis. Clustering  
69 was conducted using a graph-based clustering approach within the framework of Seurat. 14  
70 clusters that were found were used for all subsequent analysis and visualized using the Seurat  
71 function *TSNEplot*. All plots were made using R (version 3.5.2, [www.r-project.org](http://www.r-project.org)) and Seurat  
72 (version 3.1.0). Unique marker genes per cluster were extracted with the Seurat function  
73 *FindAllMarkers* and the top 20 genes which displayed the highest log fold change in expression  
74 between clusters were extracted. A phylogenetic tree relating to the ‘average’ cell from each  
75 identity class was constructed from the dataset using the Seurat function *BuildClusterTree* and  
76 the resulting scaled expression data for the top 20 genes per cluster were plotted using the Seurat  
77 function *DoHeatmap*. To confirm cluster identities, published gene signatures for blood DC  
78 subtypes from Villani *et al.* (5) and Zilionis *et al.* (6) were matched against our clusters. The  
79 gene lists from Villani *et al.* were first filtered to remove any blood-specific genes that did not  
80 appear in any of our single cell dataset. A signature score was then calculated for each signature  
81 and cluster using the Seurat function *AddModuleScore*. Resulting scores were plotted using the  
82 Seurat function *VlnPlot*.

83

#### 84 **Next Generation RNA transcriptome Sequencing of human lung DC subsets**

85 ***Total RNA preparation.*** Sorted lung DC subsets were resuspended in 350 µl of  
86 RLT Plus buffer (Qiagen) and stored at -80° C. Cell lysates were thawed, and total RNA was

87 extracted using RNeasy Plus Micro Kit (Qiagen) according to the manufacturer's protocol.  
88 RNA quality and quantity were assessed on the Fragment Analyzer platform (AATI) using high  
89 sensitivity RNA analysis kit. Only samples with RNA Integrity Number >8 were subsequently  
90 used.

91 *Whole transcriptome profiling by RNA sequencing.* 1.5 ng of total RNA was used  
92 as input to create total RNA libraries using Ovation® SoLo RNA-Seq System (NuGEN  
93 Technologies) according to the manufacturer's protocol. Libraries were validated on the  
94 Fragment Analyzer platform (AATI) using standard sensitivity NGS fragment analysis kit and  
95 the concentration was determined using Quant-iT dsDNA High Sensitivity assay kit on the  
96 Qubit fluorometer (Thermo Fisher). Sample libraries were pooled in equimolar concentrations,  
97 diluted, and denatured according to Illumina guidelines. Sequencing was performed using a  
98 High Output Kit v2 (150 cycles) on an Illumina NextSeq500.

99 *Data analysis.* The TPM (transcript per million) counts from the bulk RNA  
100 sequencing dataset of the FACs-sorted cDC1, cDC2, pDC and CD14<sup>+</sup> monocytes were log  
101 transformed and expression of genes of interest were plotted as a heatmap using the function  
102 *pheatmap* (7) (*pheatmap*: Pretty Heatmaps, version 0.12, [https://CRAN.R-](https://CRAN.R-project.org/package=pheatmap)  
103 [project.org/package=pheatmap](https://CRAN.R-project.org/package=pheatmap)). Ingenuity Pathway Analysis (IPA; QIAGEN) was used to  
104 functionally categorize differentially expressed genes and to biocomputationally identify  
105 putative upstream regulators responsible for differential gene expression signatures.

106

## 107 **Flow cytometry**

108 *Extracellular surface marker staining.* Lung single cell suspensions were  
109 incubated with Aqua LIVE/DEAD (Thermofisher) in PBS for 15 minutes at 4°C. After 2  
110 washing steps with PBS, cells were stained in PBS containing 0,5% Fetal Calf Serum (FCS)  
111 (Invitrogen) and 2mM EDTA (Invitrogen) with anti-human CD45-BV605 (clone HI30), HLA-

112 DR-BV786 (clone G46-6), CD3 $\epsilon$ -FITC (clone UCHT1), CD19-FITC (clone HIB19), CD56-  
113 FITC (clone B159), CD66b-FITC (clone G10F5), CD16-PerCP-Cy5.5 (clone 3G8), CD11c-  
114 PE-CF594 (clone B-ly6), CD141-BV711 (clone 1A4), CD3 $\epsilon$ -PE-CF594 (clone UCHT1),  
115 ICOS-BV421 (clone DX29), CXCR5-PerCP-Cy5.5 (clone RF8B2), CXCR5-BUV395 (clone  
116 RF8B2), CXCR4-BUV395 (clone 12G5), PD-L1-BUV395 (clone MIH1), Fc $\epsilon$ RI-PE (clone  
117 AER37) (all from BD Biosciences), CD123-PE-Cy7 (clone 6H6), CD172a-APC (clone 15-  
118 414), CD14-AF700 (clone 63D3), CD1c-BV421 (L161), CLEC9a-APC (clone 8F9), XCR1-  
119 PE (clone S15046E), CD206-APC (clone 15-2), CD1a-PE-Cy7 (clone HI149), PD-1-BV711  
120 (clone EH12.2H7), OX40-PE-Cy7 (clone Ber-ACT35), EBI2-PE (clone SA313E4), ICOSL-  
121 PE-Cy7 (clone 2D3), CD1a-PE-Cy7 (clone HI149) (all from Biolegend) and OX40L-PE (clone  
122 ANC10G1) (Ansell) for 30 minutes at 4°C.

123 *Intracellular cytokine staining.* To assess the expression of intracellular  
124 cytokines, cells were stimulated with PMA (30ng/ml) and ionomycin (1 $\mu$ g/ml) (both from  
125 Sigma) for 6h in the presence of GolgiPlug and GolgiStop (both from BD Biosciences) for the  
126 last 4h. After stimulation, extracellular surface markers were stained before cells were fixed  
127 and permeabilized (Fixation/Permeabilization Buffer Set, BD Biosciences). Next, cells were  
128 stained with anti-human IL-21-eFluor660 (clone 3A3-N2) (eBioscience), CXCL13-PE (clone  
129 53610) (R&D Systems) and IFN- $\gamma$ -AF700 (clone B27) (BD Biosciences) for 30 minutes at 4°C  
130 in Perm/Wash buffer (BD Biosciences).

131 *Intracellular transcription factor staining.* To assess the expression of  
132 intracellular transcription factors, cells were stained for extracellular markers before fixation  
133 and permeabilization (Fixation/Permeabilization Buffer Set, eBioscience). Next, cells were  
134 stained with anti-human unconjugated Bcl6 (rabbit polyclonal) (Abcam), IRF4-PE-Cy7 (clone  
135 3E4) and IRF8-APC (clone V3GYWCH) (both from eBioscience) for 30 minutes at 4°C in  
136 Permeabilization Buffer (eBioscience). To detect the rabbit Bcl6, samples were incubated with

137 goat anti-rabbit IgG-PE (Invitrogen) for 15 minutes at 4°C in Permeabilization Buffer  
138 (eBioscience).

139 All samples were acquired on a FACS Fortessa instrument (BD Biosciences) and  
140 data was analyzed via FlowJo (Treestar).

141

#### 142 **Lung DC subset FACS sorting**

143 The HLA-DR<sup>+</sup> cell fraction was prepurified from total lung cells via the MACS  
144 HLA-DR<sup>+</sup> purification kit according to manufacturer's protocol (Miltenyi Biotec). HLA-DR<sup>+</sup>  
145 cells were stained with Aqua LIVE/DEAD, anti-human CD45, HLA-DR, Lineage (CD3ε,  
146 CD19, CD56, CD66b), CD11c, CD16, CD141, CD172a, CD1c, CD14 as previously described  
147 in this online methods section. Subsequently, DC subsets were sorted with a FACS Aria III  
148 instrument (BD Biosciences).

149

#### 150 **Blood naïve CD4<sup>+</sup> T cell isolation and CFSE labeling**

151 Peripheral blood was collected from healthy subjects via venous puncture in  
152 Gothenburg, Sweden, under written informed consent. The study was reviewed and approved  
153 by the ethical committee/review board in Gothenburg, Sweden, according to the Declaration of  
154 Helsinki (number 033-10). Peripheral Blood Mononuclear Cells (PBMC) were prepared by  
155 blood centrifugation on a Ficoll gradient (Lymphoprep, Greiner Bio-One). PBMCs were  
156 viability frozen in Fetal Calf Serum (FCS) with 10% dimethyl sulfoxide (DMSO) (both  
157 Invitrogen) until lung tissue was obtained from the Sahlgrenska Hospital (Gothenburg,  
158 Sweden). Naïve CD4<sup>+</sup> T cells were isolated from thawed PBMC aliquots by negative selection  
159 using the Human Naïve CD4<sup>+</sup> T Cell Isolation Kit according to the manufacturer's instructions  
160 (Miltenyi Biotec). After isolation, cells were stained with 0,25µM CarboxyFluorescein  
161 Succinimidyl Ester (CFSE) (eBioscience) for 10 minutes at room temperature in PBS

162 (Invitrogen). CD4<sup>+</sup> T-cell purity and viability were assessed before each experiment via flow  
163 cytometry.

164

#### 165 **Mixed Leukocyte Reaction (MLR)**

166 Sorted lung DC (5000) were co-cultured with purified CFSE-labeled allogeneic  
167 naïve blood CD4<sup>+</sup> T-cells (25000) in RPMI medium supplemented with  
168 Penicillin/Streptomycin, L-Glutamine and 10% heat-inactivated FCS (all from Invitrogen).  
169 After 4 days or 6-7 days, intracellular Bcl6 expression and intracellular IL-21, CXCL13 and  
170 IFN- $\gamma$  levels respectively, were analyzed via flow cytometry as previously described in this  
171 online methods section. In some experiments, 1 $\mu$ g/ml anti-human OX40L (oxelumab) or IgG  
172 isotype control (both from Biovision) was added.

173

#### 174 **RNAscope of GOLD IV COPD lung TLO**

175 Lung tissue biopsies were collected, fixed in formalin, dehydrated and embedded  
176 in paraffin according to standard protocol. Blocks were cut into 4  $\mu$ m sections and placed on  
177 superfrost plus glasses (ThermoFischer scientific). RNAscope 2.5 LS Duplex *in situ*  
178 hybridization was performed according to manufacturer's protocol (Advanced Cell  
179 Diagnostics, Newark, CA) on a Leica Bond Rx autostainer (Leica). Heat induced epitope  
180 retrieval was performed for 15 minutes at 95°C using ER2 and protease was applied for 15  
181 minutes. Probes used were: Hs-CD19 and Hs-CH25H. Chromogens applied were bond polymer  
182 define detection (brown) and bond polymer refine red detection (both Leica Biosystems) and  
183 sections were counterstained with hematoxylin. Slides were mounted using pertex mounting  
184 medium and scanned on an aperio scan scope at 20x magnification.

185

186



187 **Fluorescence imaging of GOLD IV COPD lung TLO**

188 Lung tissue biopsies were collected and embedded in OCT. Blocks were cut into  
189 4 µm sections and placed on superfrost plus glasses (ThermoFischer scientific). Samples were  
190 fixed in acetone (Sigma-Aldrich) for 15 minutes at room temperature. Subsequently, samples  
191 were blocked with IHC/ICC Blocking Buffer (eBioscience) for 15 minutes at room temperature.  
192 Afterwards, samples were stained with CD3ε-AF647 (clone UCHT1), CD11c-FITC (clone B-  
193 ly6) (both BD Biosciences), CD19-Biotin/AF594 (clone HIB19), CD1c-Biotin/AF542 (clone  
194 L161) (both Biolegend) and Hoechst nuclear staining (Thermofisher Scientific). Biotin pre-  
195 labeling with fluorochromes was performed using the Flexistain™ labeling kit according to the  
196 manufacturer's protocol (Kromnigon AB, Sweden). Microscopy images were acquired using  
197 an LSM 880 system (Carl Zeiss Microscopy, Germany) equipped with a Zeiss Image Z.1  
198 microscope, Plan-Apochromat 40x/1,3 objective (Carl Zeiss Microscopy, Germany).  
199 Brightness and contrast were adjusted using the Zen software (Black ed. v. 2,3, Carl Zeiss  
200 Microscopy, Germany).

201

202 **Statistics**

203 Statistical analyses were calculated with GraphPad Prism (version 8) (GraphPad Software Inc,  
204 US) and the tests used are mentioned in the figure legends. *P* values less than 0,05 were  
205 considered as significant.

206 **References**

207

208 1. Pauwels RA, Buist AS, Calverley PM, Jenkins CR, Hurd SS, Committee GS. Global strategy for the  
209 diagnosis, management, and prevention of chronic obstructive pulmonary disease.  
210 NHLBI/WHO Global Initiative for Chronic Obstructive Lung Disease (GOLD) Workshop  
211 summary. *Am J Respir Crit Care Med* 2001; 163: 1256-1276.

212 2. Kim D, Langmead B, Salzberg SL. HISAT: a fast spliced aligner with low memory requirements. *Nat*  
213 *Methods* 2015; 12: 357-360.

214 3. Liao Y, Smyth GK, Shi W. featureCounts: an efficient general purpose program for assigning sequence  
215 reads to genomic features. *Bioinformatics* 2014; 30: 923-930.

216 4. Patro R, Mount SM, Kingsford C. Sailfish enables alignment-free isoform quantification from RNA-  
217 seq reads using lightweight algorithms. *Nat Biotechnol* 2014; 32: 462-464.

218 5. Villani AC, Satija R, Reynolds G, Sarkizova S, Shekhar K, Fletcher J, Griesbeck M, Butler A, Zheng S,  
219 Lazo S, Jardine L, Dixon D, Stephenson E, Nilsson E, Grundberg I, McDonald D, Filby A, Li W, De  
220 Jager PL, Rozenblatt-Rosen O, Lane AA, Haniffa M, Regev A, Hacohen N. Single-cell RNA-seq  
221 reveals new types of human blood dendritic cells, monocytes, and progenitors. *Science* 2017;  
222 356.

223 6. Zilionis R, Engblom C, Pfirschke C, Savova V, Zemmour D, Saatcioglu HD, Krishnan I, Maroni G,  
224 Meyerovitz CV, Kerwin CM, Choi S, Richards WG, De Rienzo A, Tenen DG, Bueno R, Levantini  
225 E, Pittet MJ, Klein AM. Single-Cell Transcriptomics of Human and Mouse Lung Cancers Reveals  
226 Conserved Myeloid Populations across Individuals and Species. *Immunity* 2019; 50: 1317-1334  
227 e1310.

228 7. Kolde R, Vilo J. GOsummaries: an R Package for Visual Functional Annotation of Experimental Data.  
229 *F1000Res* 2015; 4: 574.

230

231 **Supplemental figure legends**

232

233 **Figure E1: Human non-obstructed lungs contain a highly heterogeneous myeloid cell**  
234 **compartment.** (A) Gating strategy for isolating different Lin<sup>-</sup>HLA-DR<sup>+</sup> subsets from non-  
235 obstructed peritumoral lung resections. Representative flow cytometry plots showing  
236 identification of the different DC subsets in human non-obstructed peritumoral lung tissue.  
237 Within the viable CD45<sup>+</sup>Lin<sup>-</sup>HLA-DR<sup>+</sup> cell gate, pDC were identified as CD11c<sup>-</sup>CD123<sup>+</sup>. cDC1  
238 were CD16<sup>-</sup>CD11c<sup>+</sup>CD172a<sup>-</sup>CD141<sup>+</sup> while cDC2 were CD16<sup>-</sup>CD11c<sup>+</sup>CD172a<sup>+</sup>CD1c<sup>+</sup>.  
239 Furthermore, CD14<sup>+</sup> monocytes were CD16<sup>-</sup>CD11c<sup>+</sup>CD172a<sup>+</sup>CD1c<sup>-</sup>CD14<sup>+</sup> and CD16<sup>+</sup>  
240 monocytes were gated as CD16<sup>+</sup>CD11c<sup>+</sup> cells containing both CD16<sup>+</sup>CD14<sup>-</sup> and CD16<sup>+</sup>CD14<sup>+</sup>  
241 fractions. Finally, a Lin<sup>-</sup>HLA-DR<sup>+</sup> population was found that scored negative for all markers  
242 included in the flow cytometry panel. This population was considered as unidentified (un).  
243 Shown are representative dot plots from 3 donors (B) *t*-SNE feature plots of the indicated genes  
244 defining expression levels in the different clusters. Each dot represents an individual cell (n=3  
245 donors). (C) Flow cytometry analysis of the different DC subsets from non-obstructed  
246 peritumoral lung resections revealed a CD14<sup>+</sup> cDC2 fraction and heterogeneous FcεRI and  
247 CD1a expression within cDC2. Shown are representative histograms from 3 donors. (D) Flow  
248 cytometry plots depicting expression of FcεRI, CD1a, IRF8 and IRF4 by CD1c<sup>+</sup>CD14<sup>-</sup> and  
249 CD1c<sup>+</sup>CD14<sup>+</sup> cDC2. Shown are representative plots of 3 non-obstructed peritumoral lung  
250 resections.

251

252 **Figure E2: Lung cDC2 are the most potent inducers of Tfh-like cell polarization.** DC  
253 subsets were purified from non-obstructed peritumoral lung resections and co-cultured with  
254 allogeneic naïve blood CD4<sup>+</sup> T-cells that were pre-labeled with CFSE. (A) Percentages of  
255 ICOS<sup>+</sup>PD-1<sup>+</sup> T-cells (n=10) in the different DC/T-cell co-cultures were determined at d7 of the

256 co-culture via flow cytometry. Shown are representative flow cytometry plots for the different  
257 DC/T-cell co-cultures corresponding to the cumulative data depicted in Figure 2A. (B)  
258 Intracellular IL-21 (n=10) and CXCL13 (n=6) staining of ICOS<sup>+</sup>PD-1<sup>+</sup> (purple), ICOS<sup>-</sup>PD-1<sup>+</sup>  
259 (orange), ICOS<sup>+</sup>PD-1<sup>-</sup> (blue) and ICOS<sup>-</sup>PD-1<sup>-</sup> (black) T-cell subsets in cDC2/T-cell co-cultures  
260 after restimulation with PMA and ionomycin in the presence of Golgi-plug and Golgi-stop.  
261 Shown are representative flow cytometry plots corresponding to the cumulative data depicted  
262 in Figure 2C (C) Proportions of ICOS<sup>+</sup>CXCR5<sup>+</sup> T-cells in the different DC/T-cell co-cultures  
263 were determined at day 4. Shown are representative flow cytometry plots corresponding to the  
264 cumulative data depicted in Figure 2E (n=6). (D) Percentages of PD-1<sup>hi</sup>BCL6<sup>hi</sup> cells in  
265 ICOS<sup>+</sup>CXCR5<sup>+</sup>, ICOS<sup>+</sup>CXCR5<sup>-</sup> and ICOS<sup>-</sup>CXCR5<sup>-</sup> T-cell subsets in the cDC2/T-cell co-  
266 cultures were determined via flow cytometry. Shown are representative flow cytometry plots  
267 corresponding to the cumulative data depicted in Figure 2F (n=6).

268

269 **Figure E3: Lung cDC2 are the most potent inducers of Tfh-like cell polarization.** DC  
270 subsets were purified from non-obstructed peritumoral lung resections and co-cultured with  
271 allogeneic naïve blood CD4<sup>+</sup> T-cells that were prelabeled with CFSE. (A) Proliferation of T-  
272 cells was assessed via flow cytometry at day 7. Shown are representative histograms of CFSE<sup>lo</sup>  
273 T-cell proportions present in the indicated co-cultures and combined data graph in which each  
274 symbol represents an individual donor (n=10). (B) Intracellular IFN- $\gamma$  (n=10) staining of  
275 ICOS<sup>+</sup>PD-1<sup>+</sup> (purple), ICOS<sup>-</sup>PD-1<sup>+</sup> (orange), ICOS<sup>+</sup>PD-1<sup>-</sup> (blue) and ICOS<sup>-</sup>PD-1<sup>-</sup> (black) T-  
276 cell subsets in cDC2/T-cell co-cultures at day 7 after restimulation with PMA and ionomycin  
277 in the presence of Golgi-plug and Golgi-stop. Shown are representative flow cytometry plots  
278 and combined data graph in which each symbol represents an individual donor. (C) Percentages  
279 of ICOS<sup>+</sup>PD-1<sup>+</sup>IFN- $\gamma$ <sup>+</sup> T-cells in cDC2/T-cell and cDC1/T-cell co-cultures were determined

280 after 7 days. Each symbol represents an individual donor (n=10). \*\*p<0.01, \*\*\*p<0.001,  
281 Tukey's multiple comparison test (A and B) and Student *t*-test (C).

282

283 **Figure E4: cDC2 from COPD GOLD II lungs display increased potential to promote Tfh-**  
284 **like cell skewing.** (A), (B) and (C) cDC2 were isolated from COPD GOLD II peritumoral lung  
285 tissues (n=7) and co-cultured with allogeneic naïve CD4<sup>+</sup> T-cells that were prelabeled with  
286 CFSE. Proportions of ICOS<sup>+</sup>PD-1<sup>+</sup> T-cells (A) and ICOS<sup>+</sup>PD-1<sup>+</sup>IL-21<sup>+</sup> T-cells (B) were  
287 determined at day 7 and compared to cells from non-obstructed peritumoral lung tissues used  
288 in Figure 2 (n=10). Shown are representative flow cytometry plots corresponding to the  
289 cumulative data depicted in Figure 3A (E4A) and 3B (E4B) respectively. (C) Proliferation of  
290 T-cells (% of CFSE<sup>lo</sup> T-cells) was assessed via flow cytometry at day 7. Shown is combined  
291 data graph in which each symbol represents an individual donor. (D) CD1c<sup>+</sup>CD14<sup>+</sup> fractions  
292 within cDC2 from non-obstructed control and COPDII peritumoral lung tissue used in the co-  
293 culture experiments presented in Figure 2 and 3. Show is the summary data graph (n=10 for  
294 control and n=7 for COPD). (E) Percentages of ICOS<sup>+</sup>PD-1<sup>+</sup> Tfh-like cells in peritumoral lung  
295 tissue resections of COPD and non-obstructed control subjects determined via flow cytometry.  
296 Shown are representative flow cytometry plots corresponding to the cumulative data depicted  
297 in Figure 3C (n=6 for controls and n=5 for COPD subjects).

298

299 **Figure E5: cDC2 exhibit a unique migratory pattern.** (A) Surface levels of CXCR5, CXCR4  
300 and EBI2 were measured on cDC2 and cDC1 from non-obstructed peritumoral lung resections  
301 via flow cytometry (n=8 for CXCR5, n=5 for CXCR4 and n=7 for EBI2). Shown are  
302 representative flow cytometry histograms for each marker and corresponding isotype.  
303 Cumulative data of this experiment depicted in Figure 4A. (B) Surface levels of CXCR5,  
304 CXCR4 and EBI2 were measured on cDC2 from non-obstructed and COPD peritumoral lung

305 resections via flow cytometry (control n=8; and COPD n=4 for CXCR5, control n=5; and  
306 COPD n=3 for CXCR4 and control n=7; and COPD n=4 for EBI2). Shown is summary data  
307 graph for all the markers (mean MFI corrected for background intensity). (C) Surface EBI2  
308 levels on ICOS<sup>+</sup>PD-1<sup>+</sup> (purple), ICOS<sup>-</sup>PD-1<sup>+</sup> (orange), ICOS<sup>+</sup>PD-1<sup>-</sup> (blue) and ICOS<sup>-</sup>PD-1<sup>-</sup>  
309 (black) T-cell subsets in the lung measured via flow cytometry. Shown are representative flow  
310 cytometry histograms for EBI2 and isotype of corresponding cumulative data depicted in Figure  
311 4B (n=10).

312 **Supplemental Tables**

313

314 **Table E1: Single Cell cluster markers top 20 by logFC**

| Cluster | Gene     | avg_logFC   |
|---------|----------|-------------|
| 1       | FCER1A   | 2,088139734 |
| 1       | CD1C     | 1,706769549 |
| 1       | CCL17    | 1,449676397 |
| 1       | HLA-DQB1 | 1,198897632 |
| 1       | CD1E     | 1,159336889 |
| 1       | HLA-DQA1 | 1,084527054 |
| 1       | FCGR2B   | 1,068335054 |
| 1       | CD1A     | 1,042954992 |
| 1       | CLEC10A  | 1,027904208 |
| 1       | CD1B     | 0,950553648 |
| 1       | MS4A6A   | 0,930901312 |
| 1       | HLA-DRB1 | 0,903968868 |
| 1       | HLA-DRA  | 0,902474636 |
| 1       | PKIB     | 0,890630909 |
| 1       | CD86     | 0,829732946 |
| 1       | C15orf48 | 0,82015284  |
| 1       | SGK1     | 0,81219212  |
| 1       | MNDA     | 0,812000223 |
| 1       | GPR183   | 0,807344769 |
| 1       | YWHAH    | 0,798773794 |
| 2       | FN1      | 2,095765876 |
| 2       | FABP4    | 1,596997079 |
| 2       | MARCO    | 1,563296564 |
| 2       | GPNMB    | 1,478726772 |
| 2       | MSR1     | 1,390751001 |
| 2       | MCEMP1   | 1,37408424  |
| 2       | MRC1     | 1,368984707 |
| 2       | CTSD     | 1,359952157 |
| 2       | CCL18    | 1,351578234 |
| 2       | FBP1     | 1,333490303 |
| 2       | OLR1     | 1,215738999 |
| 2       | APOC1    | 1,121526259 |
| 2       | CTSB     | 1,106845823 |
| 2       | LTA4H    | 1,067928201 |
| 2       | LGALS3   | 1,05322345  |
| 2       | GCHFR    | 1,044764711 |
| 2       | VSIG4    | 0,960665094 |
| 2       | CTSL     | 0,955551603 |
| 2       | INHBA    | 0,955106343 |
| 2       | FTL      | 0,95059228  |
| 3       | HBG2     | 2,302686561 |
| 3       | HBG1     | 2,027885733 |

|   |            |             |
|---|------------|-------------|
| 3 | AC104389.5 | 1,865440664 |
| 3 | GAGE1      | 1,610717586 |
| 3 | GTSF1      | 1,424267207 |
| 3 | TOP2A      | 1,335903152 |
| 3 | NMU        | 1,299328361 |
| 3 | PRAME      | 1,280435628 |
| 3 | HBE1       | 1,274461074 |
| 3 | HIST1H1C   | 1,253113637 |
| 3 | UQCRH      | 1,252614609 |
| 3 | CKS1B      | 1,153736826 |
| 3 | STMN1      | 1,131076794 |
| 3 | PAGE5      | 1,129167523 |
| 3 | KRT18      | 1,105038367 |
| 3 | XAGE1A     | 1,088383961 |
| 3 | TPX2       | 1,033839997 |
| 3 | EPRS       | 1,024921962 |
| 3 | CENPF      | 1,021810842 |
| 3 | IFITM1     | 1,011736626 |
| 4 | GZMB       | 3,575265882 |
| 4 | JCHAIN     | 2,767735764 |
| 4 | PLAC8      | 2,105195767 |
| 4 | CCDC50     | 1,883419665 |
| 4 | TCF4       | 1,859471292 |
| 4 | C12orf75   | 1,831600843 |
| 4 | IGKC       | 1,808955309 |
| 4 | TCL1A      | 1,801589347 |
| 4 | TSPAN13    | 1,716220583 |
| 4 | CLEC4C     | 1,693808536 |
| 4 | BCL11A     | 1,674993584 |
| 4 | IRF4       | 1,637598991 |
| 4 | UGCG       | 1,568753728 |
| 4 | SELL       | 1,502616827 |
| 4 | PPP1R14B   | 1,47257052  |
| 4 | SOX4       | 1,456868998 |
| 4 | HBB        | 1,438319472 |
| 4 | ALOX5AP    | 1,389828099 |
| 4 | CLIC3      | 1,361646152 |
| 4 | SLC15A4    | 1,340439327 |
| 5 | VCAN       | 1,879909516 |
| 5 | THBS1      | 1,710398277 |
| 5 | S100A8     | 1,707046345 |
| 5 | S100A9     | 1,440827397 |
| 5 | IL1B       | 1,339112206 |
| 5 | EREG       | 1,241721323 |
| 5 | FCN1       | 1,091242627 |
| 5 | CD300E     | 1,050490024 |
| 5 | CXCL8      | 1,011534339 |
| 5 | APOBEC3A   | 0,876431337 |



|   |          |             |
|---|----------|-------------|
| 5 | SLC11A1  | 0,84018397  |
| 5 | BTBD9    | 0,809890351 |
| 5 | CNOT11   | 0,788145477 |
| 5 | PCDH9    | 0,753261137 |
| 5 | LYZ      | 0,72719212  |
| 5 | SLC2A3   | 0,726358945 |
| 5 | DOCK7    | 0,725081441 |
| 5 | RPSAP48  | 0,719022886 |
| 5 | AREG     | 0,716165035 |
| 5 | NCALD    | 0,707815369 |
| 6 | CCL5     | 3,094512646 |
| 6 | CD3D     | 2,545536387 |
| 6 | CD2      | 2,251160687 |
| 6 | TRAC     | 2,199659021 |
| 6 | TRBC2    | 2,065034272 |
| 6 | CD3G     | 1,867353038 |
| 6 | GZMA     | 1,743103623 |
| 6 | CD96     | 1,737923673 |
| 6 | SYNE2    | 1,699053241 |
| 6 | LCK      | 1,622384641 |
| 6 | CD52     | 1,53198628  |
| 6 | IFNG     | 1,53013766  |
| 6 | CLEC2D   | 1,491061473 |
| 6 | CD69     | 1,481444892 |
| 6 | TRBC1    | 1,454386996 |
| 6 | RORA     | 1,405689794 |
| 6 | MKI67    | 1,374739993 |
| 6 | TNFAIP3  | 1,301620037 |
| 6 | TRAT1    | 1,299873087 |
| 6 | GNLY     | 1,295854049 |
| 7 | FCGR3A   | 1,721454744 |
| 7 | FCN1     | 1,572985976 |
| 7 | TNFRSF1B | 1,285868263 |
| 7 | LYST     | 1,271273287 |
| 7 | MTSS1    | 1,250671831 |
| 7 | CTSS     | 1,235559792 |
| 7 | SAT1     | 1,210844606 |
| 7 | AIF1     | 1,180556797 |
| 7 | APOBEC3A | 1,117110701 |
| 7 | LYN      | 1,090384191 |
| 7 | COTL1    | 1,088225378 |
| 7 | NAMPT    | 1,066627046 |
| 7 | MS4A7    | 1,057457697 |
| 7 | WARS     | 1,046454264 |
| 7 | HCK      | 0,994740229 |
| 7 | MAFB     | 0,95714909  |
| 7 | CARD16   | 0,949365146 |
| 7 | PECAM1   | 0,920995962 |

|    |          |             |
|----|----------|-------------|
| 7  | POU2F2   | 0,899423847 |
| 7  | PSAP     | 0,899220709 |
| 8  | C1orf54  | 2,502920156 |
| 8  | S100B    | 2,215423608 |
| 8  | CPVL     | 2,05870984  |
| 8  | WDFY4    | 2,030191206 |
| 8  | CPNE3    | 1,957136877 |
| 8  | LGALS2   | 1,665749813 |
| 8  | SNX3     | 1,646792957 |
| 8  | CST3     | 1,629844392 |
| 8  | NAPSB    | 1,60665153  |
| 8  | IDO1     | 1,57189014  |
| 8  | ID2      | 1,560949215 |
| 8  | IRF8     | 1,50888726  |
| 8  | CLNK     | 1,473985276 |
| 8  | CCND1    | 1,407907195 |
| 8  | SLAMF7   | 1,392130385 |
| 8  | NAAA     | 1,374342149 |
| 8  | CLEC9A   | 1,340110661 |
| 8  | DNASE1L3 | 1,339190346 |
| 8  | RAB7B    | 1,288662865 |
| 8  | WFDC21P  | 1,286948554 |
| 9  | SCGB3A2  | 3,795060405 |
| 9  | SCGB1A1  | 3,752372645 |
| 9  | SFTPB    | 3,513181643 |
| 9  | SFTPC    | 3,410659195 |
| 9  | SLPI     | 3,237610149 |
| 9  | BPIFB1   | 3,006507765 |
| 9  | SCGB3A1  | 2,988363079 |
| 9  | CYB5A    | 2,353858175 |
| 9  | PIGR     | 2,252972921 |
| 9  | GPRC5A   | 2,087974649 |
| 9  | SFTPA1   | 2,021757317 |
| 9  | FMO2     | 1,990456688 |
| 9  | SFTPA2   | 1,988487793 |
| 9  | KRT19    | 1,877400103 |
| 9  | FOLR1    | 1,797672424 |
| 9  | CXCL17   | 1,749139084 |
| 9  | TMC5     | 1,741303172 |
| 9  | DNAH5    | 1,732458055 |
| 9  | ELF3     | 1,708781385 |
| 9  | STEAP4   | 1,691137143 |
| 10 | VWF      | 2,563873467 |
| 10 | MGP      | 2,98839516  |
| 10 | SPARCL1  | 2,944658372 |
| 10 | EPAS1    | 2,867006965 |
| 10 | IL33     | 2,614155574 |
| 10 | TM4SF1   | 2,581506323 |

|    |          |             |
|----|----------|-------------|
| 10 | CCL21    | 2,437221467 |
| 10 | ABI3BP   | 2,381497238 |
| 10 | MMRN1    | 2,356122626 |
| 10 | ADIRF    | 2,300596205 |
| 10 | CAV1     | 2,290802751 |
| 10 | PTPRB    | 2,258068327 |
| 10 | CTNNAL1  | 2,252002567 |
| 10 | CALCRL   | 2,215405606 |
| 10 | IGFBP7   | 2,213770782 |
| 10 | VCAM1    | 2,174300302 |
| 10 | GIMAP7   | 2,169786669 |
| 10 | TNFSF10  | 2,098405801 |
| 10 | EDN1     | 2,09597821  |
| 10 | ADAMTS1  | 2,082354785 |
| 11 | CCR7     | 2,974205214 |
| 11 | BIRC3    | 2,682384903 |
| 11 | LAMP3    | 2,493221552 |
| 11 | CCL22    | 2,414283922 |
| 11 | TBC1D4   | 1,811253495 |
| 11 | IDO1     | 1,689907394 |
| 11 | TXN      | 1,636759411 |
| 11 | WFDC21P  | 1,598379937 |
| 11 | KIF2A    | 1,572294609 |
| 11 | DAPP1    | 1,556414637 |
| 11 | CCL17    | 1,522183075 |
| 11 | NUB1     | 1,422680026 |
| 11 | IL7R     | 1,382598269 |
| 11 | RASSF4   | 1,334039962 |
| 11 | CSF2RA   | 1,324384725 |
| 11 | MARCKS   | 1,322230231 |
| 11 | CD274    | 1,307035179 |
| 11 | C15orf48 | 1,273655846 |
| 11 | MARCKSL1 | 1,269756605 |
| 11 | BCL2A1   | 1,267413041 |
| 12 | CXCL10   | 3,616408913 |
| 12 | CCL8     | 2,755419177 |
| 12 | GBP1     | 2,360339823 |
| 12 | CXCL11   | 2,235367058 |
| 12 | CXCL9    | 2,182283139 |
| 12 | CCL2     | 1,808776529 |
| 12 | C15orf48 | 1,544114364 |
| 12 | GBP5     | 1,497176194 |
| 12 | IFIT3    | 1,437316392 |
| 12 | CALHM6   | 1,406032207 |
| 12 | ISG15    | 1,385695314 |
| 12 | APOBEC3A | 1,376004478 |
| 12 | STAT1    | 1,316194086 |
| 12 | IDO1     | 1,26595354  |

|    |         |             |
|----|---------|-------------|
| 12 | PLEK    | 1,180306973 |
| 12 | LAP3    | 1,173269394 |
| 12 | GBP4    | 1,171045851 |
| 12 | TFEC    | 1,025846406 |
| 12 | ANKRD22 | 1,023264534 |
| 12 | SLAMF7  | 1,021390851 |
| 13 | HPGDS   | 3,269991728 |
| 13 | CPA3    | 3,249401012 |
| 13 | MS4A2   | 3,112447667 |
| 13 | KIT     | 2,807435493 |
| 13 | CD69    | 2,424658268 |
| 13 | IL1RL1  | 2,357782247 |
| 13 | TPSB2   | 2,277193757 |
| 13 | TPSAB1  | 2,263245984 |
| 13 | HPGD    | 2,104334302 |
| 13 | HDC     | 2,085005909 |
| 13 | RHEX    | 1,992779128 |
| 13 | SLC18A2 | 1,987502805 |
| 13 | RAB27B  | 1,930387753 |
| 13 | VWA5A   | 1,920039685 |
| 13 | SCGB1A1 | 1,772399364 |
| 13 | RGS13   | 1,772384031 |
| 13 | PTGS2   | 1,577393427 |
| 13 | SLPI    | 1,501243584 |
| 13 | ACSL4   | 1,487190145 |
| 13 | EGR3    | 1,472376666 |
| 14 | FOLR2   | 2,114128205 |
| 14 | LYVE1   | 2,073485389 |
| 14 | SELENOP | 2,056837651 |
| 14 | SLC40A1 | 1,998779877 |
| 14 | RNASE1  | 1,980077253 |
| 14 | CXCL3   | 1,714787741 |
| 14 | MT1E    | 1,625695735 |
| 14 | CD14    | 1,535402852 |
| 14 | MT1X    | 1,51899883  |
| 14 | CXCL2   | 1,510258367 |
| 14 | MT1G    | 1,468134634 |
| 14 | F13A1   | 1,36859711  |
| 14 | MT2A    | 1,294103951 |
| 14 | C3AR1   | 1,277064909 |
| 14 | C1QA    | 1,274293948 |
| 14 | CD163   | 1,271227942 |
| 14 | MSR1    | 1,269660758 |
| 14 | CXCL8   | 1,266401537 |
| 14 | MAF     | 1,256446169 |
| 14 | CCL4    | 1,238808215 |

A

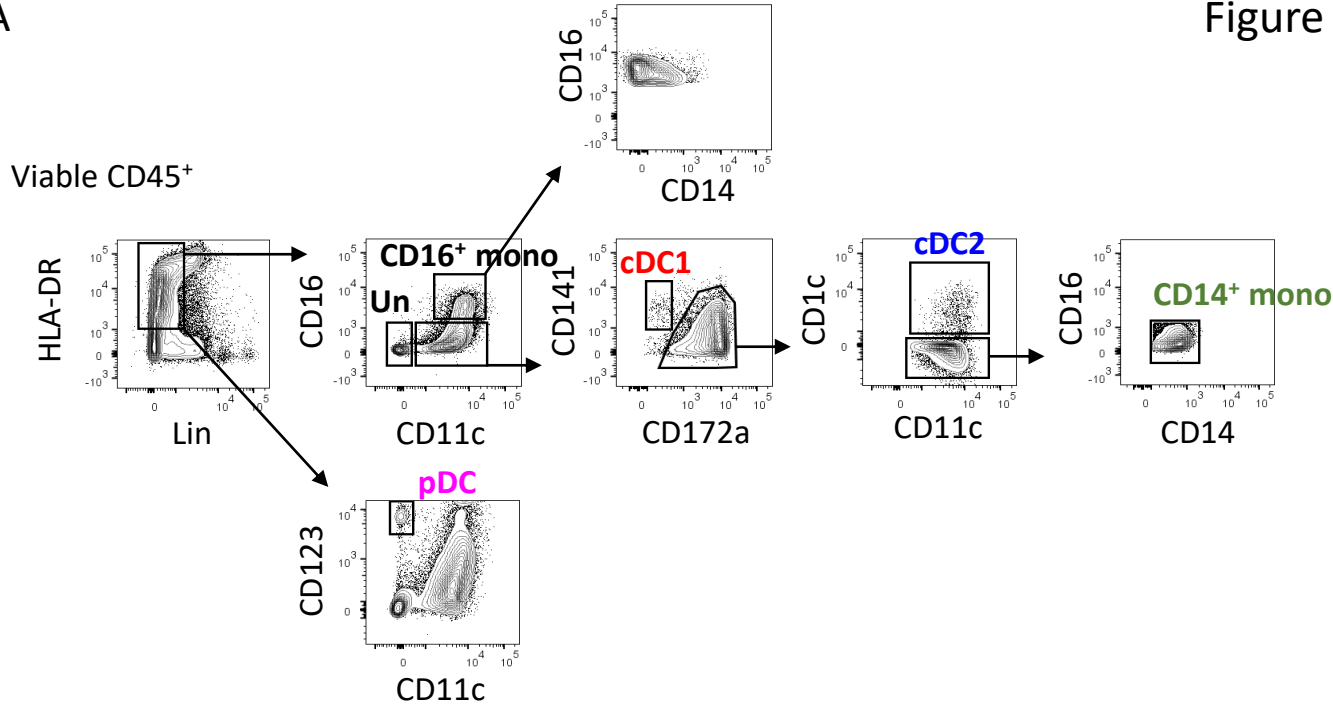

B

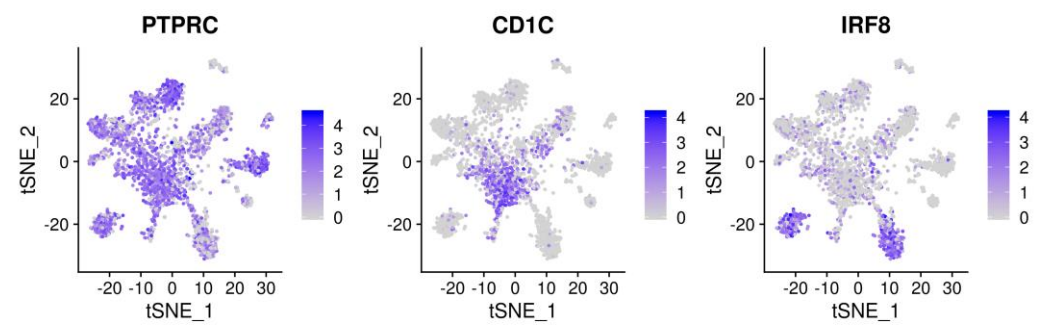

C

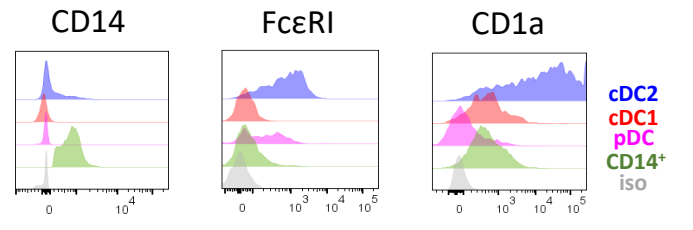

D

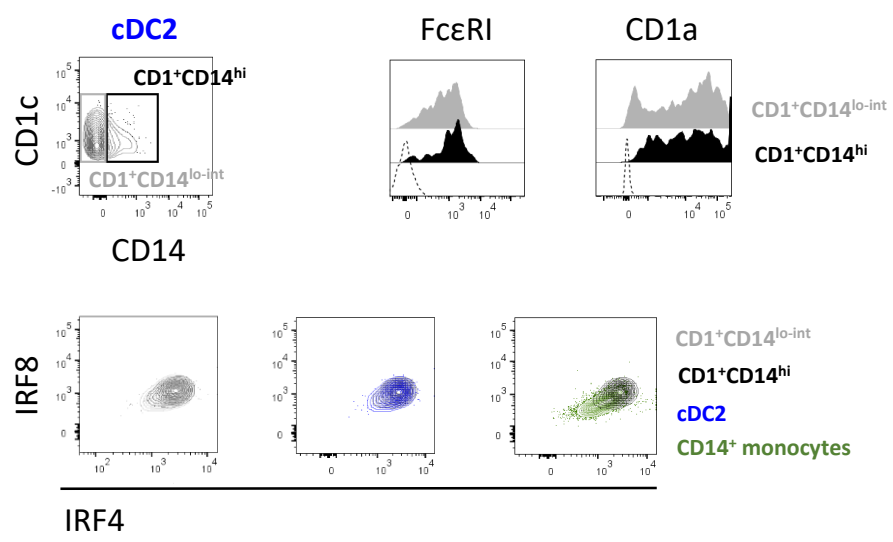

A

Viable CD3ε<sup>+</sup>

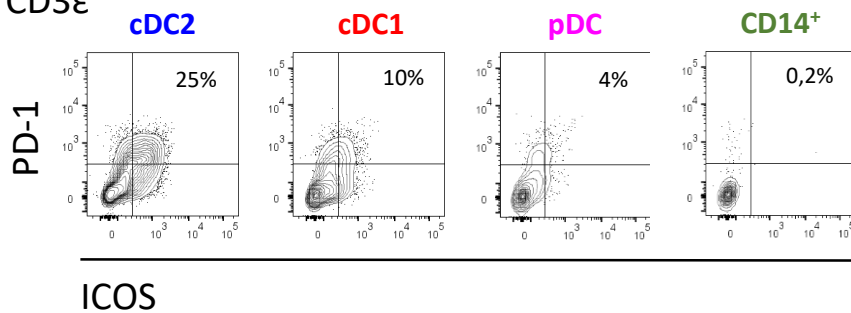

B

Viable CD3ε<sup>+</sup>

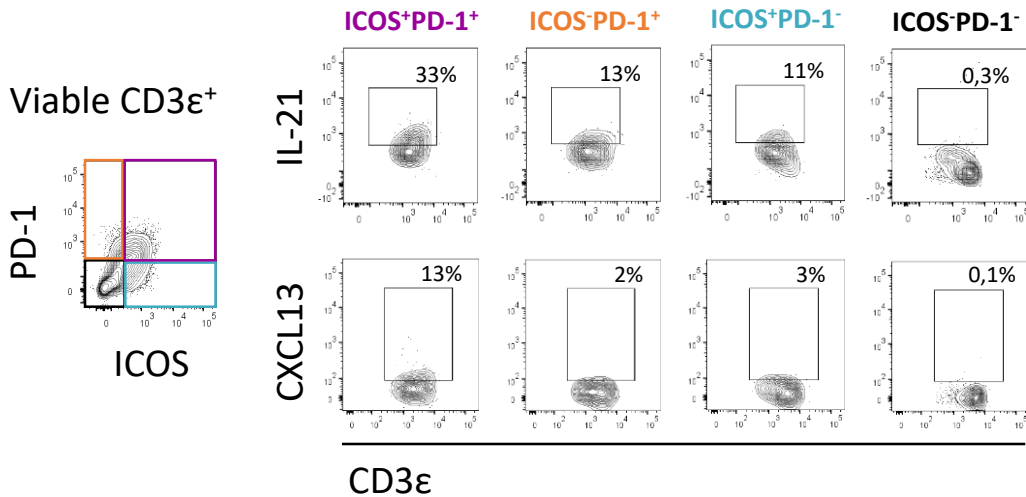

C

Viable CD3ε<sup>+</sup>

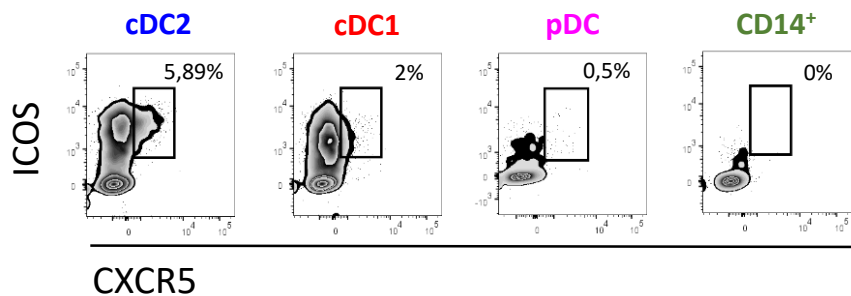

D

Viable CD3ε<sup>+</sup>

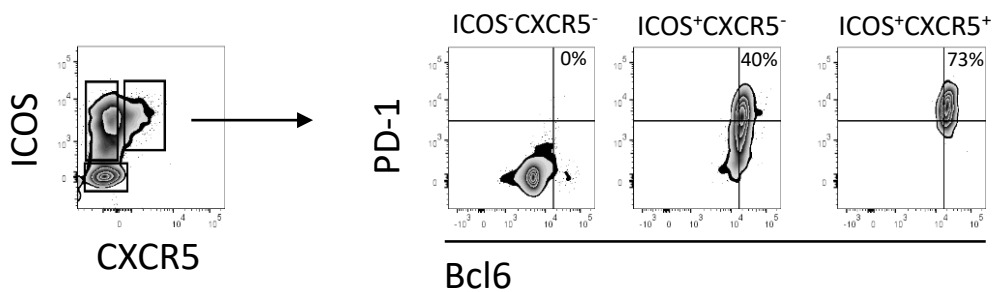

A

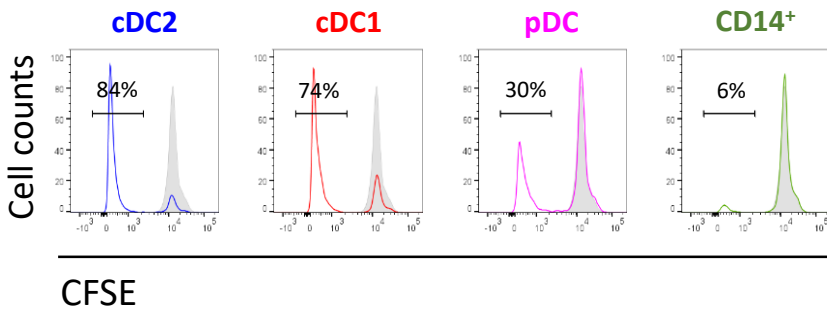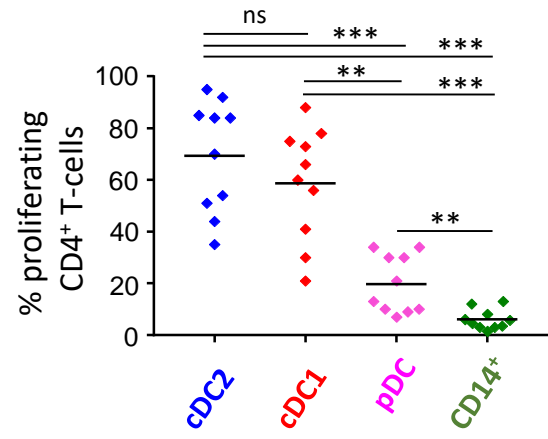

B

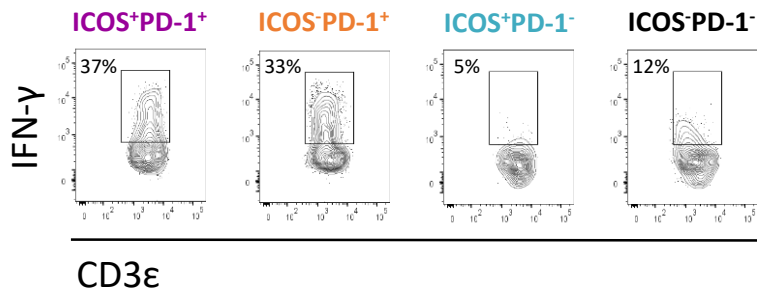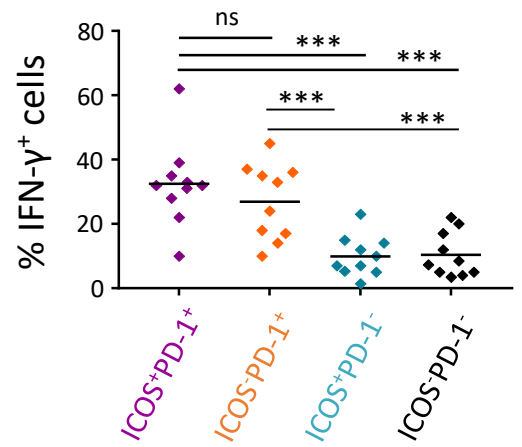

C

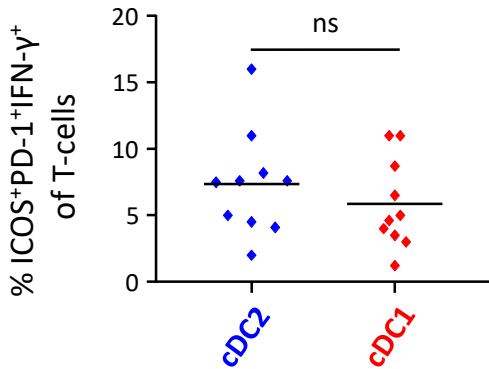

A

Viable CD3ε<sup>+</sup>

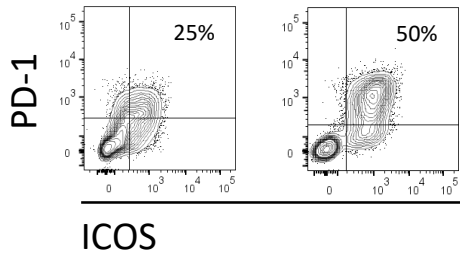

B

Viable CD3ε<sup>+</sup>PD-1<sup>+</sup>ICOS<sup>+</sup>

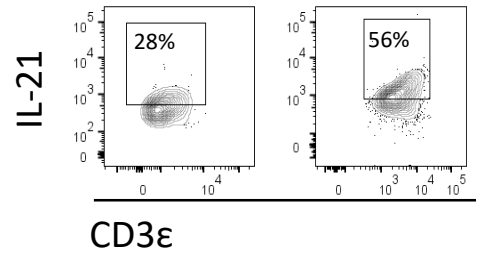

C

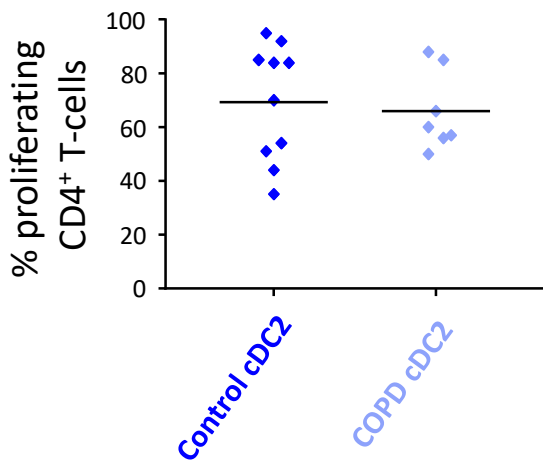

D

CD1c<sup>+</sup>CD14<sup>+</sup> proportion

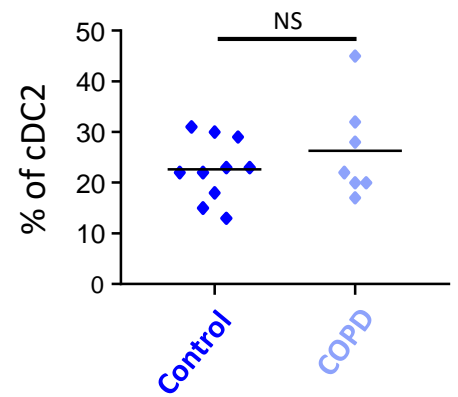

E

Viable CD3ε<sup>+</sup> CD4<sup>+</sup>

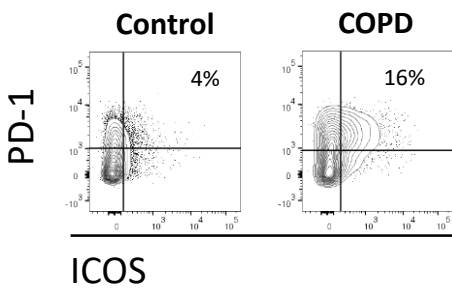



A

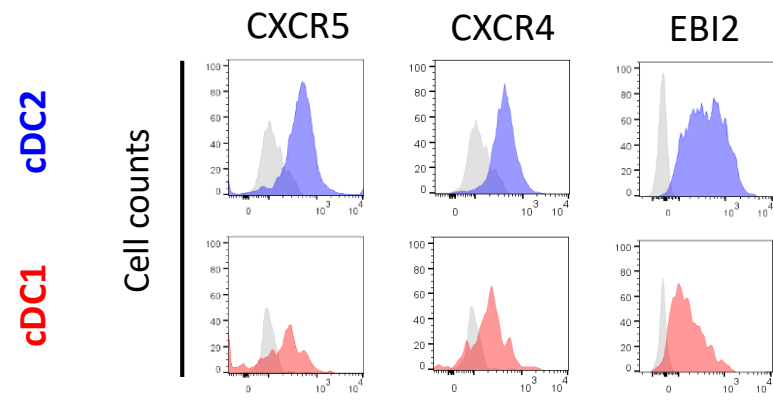

C

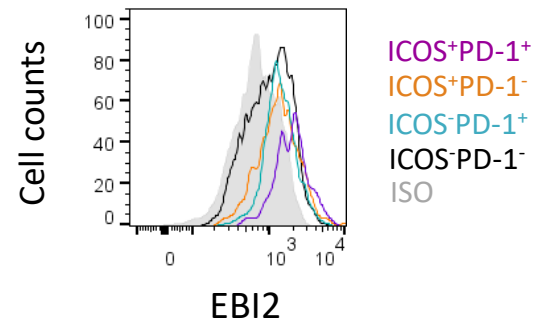

B

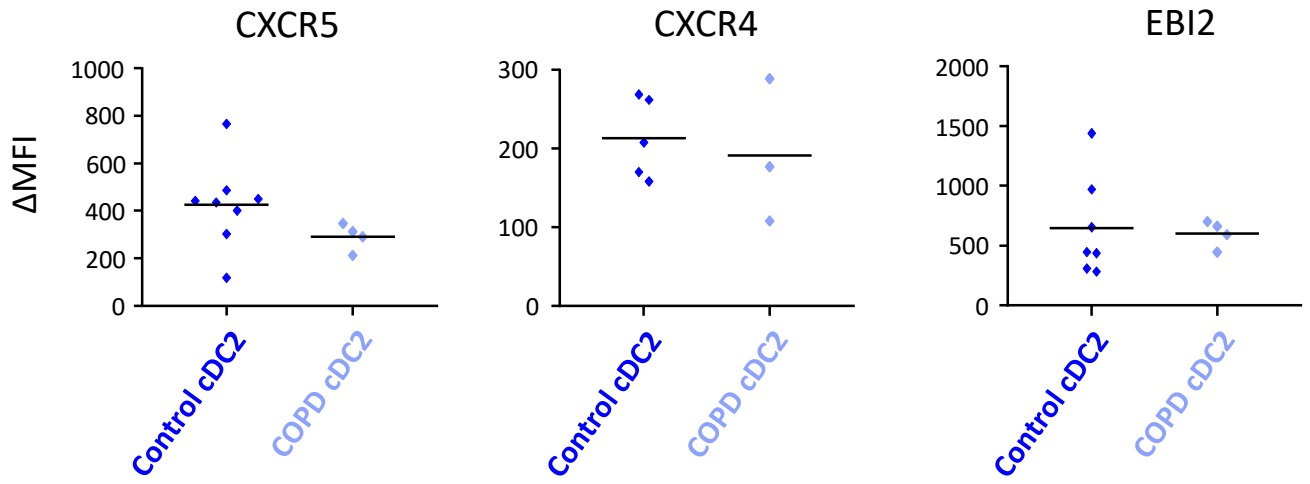

Supplement: EMS123728-Supplement_Supplemental_methods_and_results.pdf [file EMS123728-Supplement_Supplemental_methods_and_results.pdf]
